# Supplementary material for: Leveraging Prior Information to Detect Causal Variants via Multi-Variant Regression
Source: PubMed Central journal article supplement (PMC3675126; doi:10.1371/journal.pcbi.1003093), 2013-06-06
Supplement: pcbi.1003093.s001.pdf [file pcbi.1003093.s001.pdf]

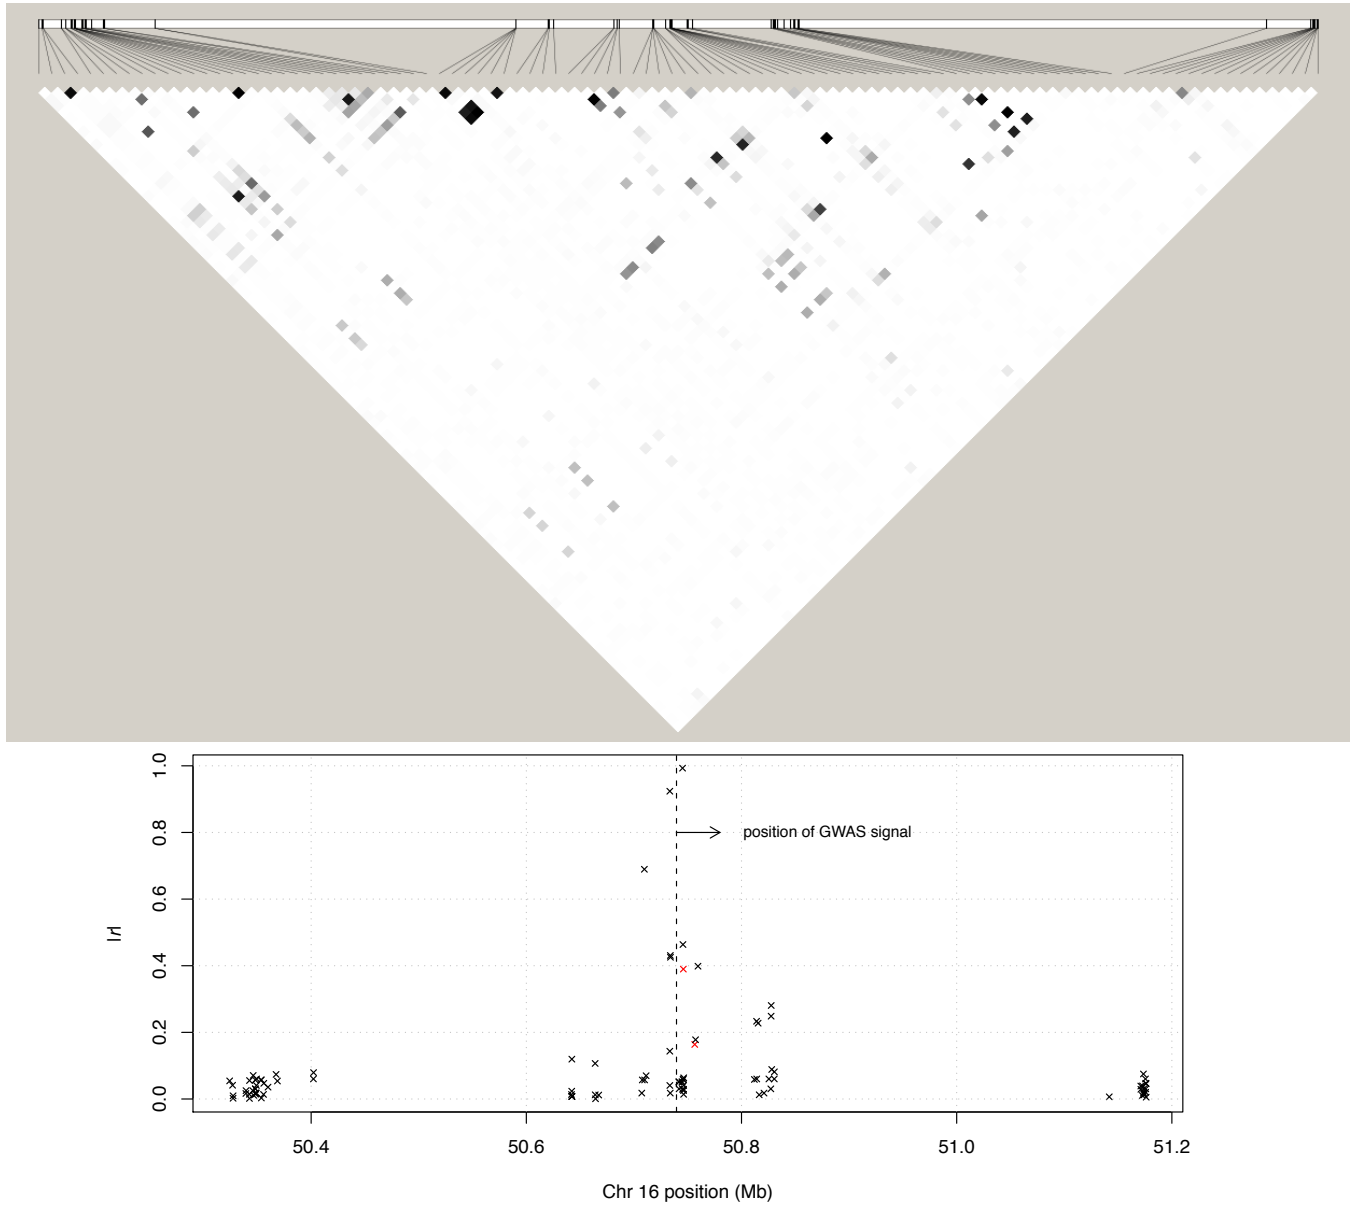

Figure S 1: Upper: pairwise LD ( $r^2$ ) of the 100 candidate variants in *NOD2* region in the exome sequencing data. Lower: LD ( $r$ ) between each candidate variant and the GWAS signal. Causal variants are marked in red color.
