# Supplementary material for: Leveraging Prior Information to Detect Causal Variants via Multi-Variant Regression
Source: PubMed Central journal article supplement (PMC3675126; doi:10.1371/journal.pcbi.1003093), 2013-06-06
Supplement: pcbi.1003093.s002.pdf [file pcbi.1003093.s002.pdf]

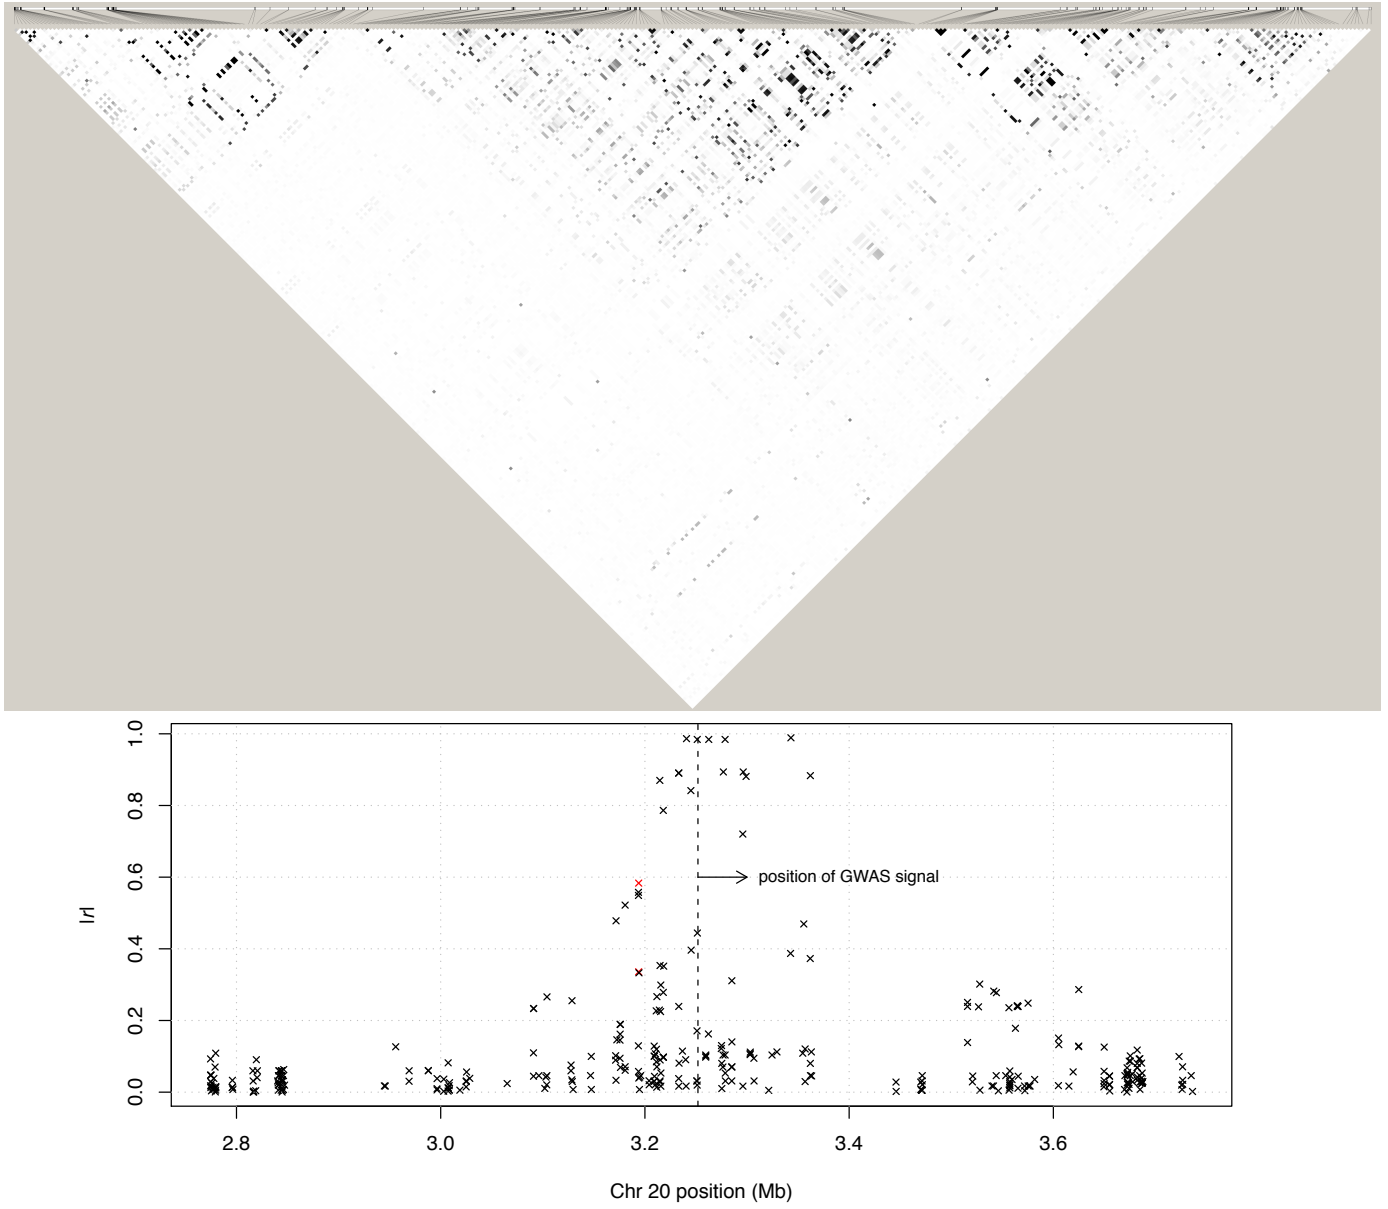

Figure S 2: Same as Figure S1 but for the 338 candidate variants in *ITPA* region.
