# Supplementary material for: Leveraging Prior Information to Detect Causal Variants via Multi-Variant Regression
Source: PubMed Central journal article supplement (PMC3675126; doi:10.1371/journal.pcbi.1003093), 2013-06-06
Supplement: pcbi.1003093.s005.pdf [file pcbi.1003093.s005.pdf]

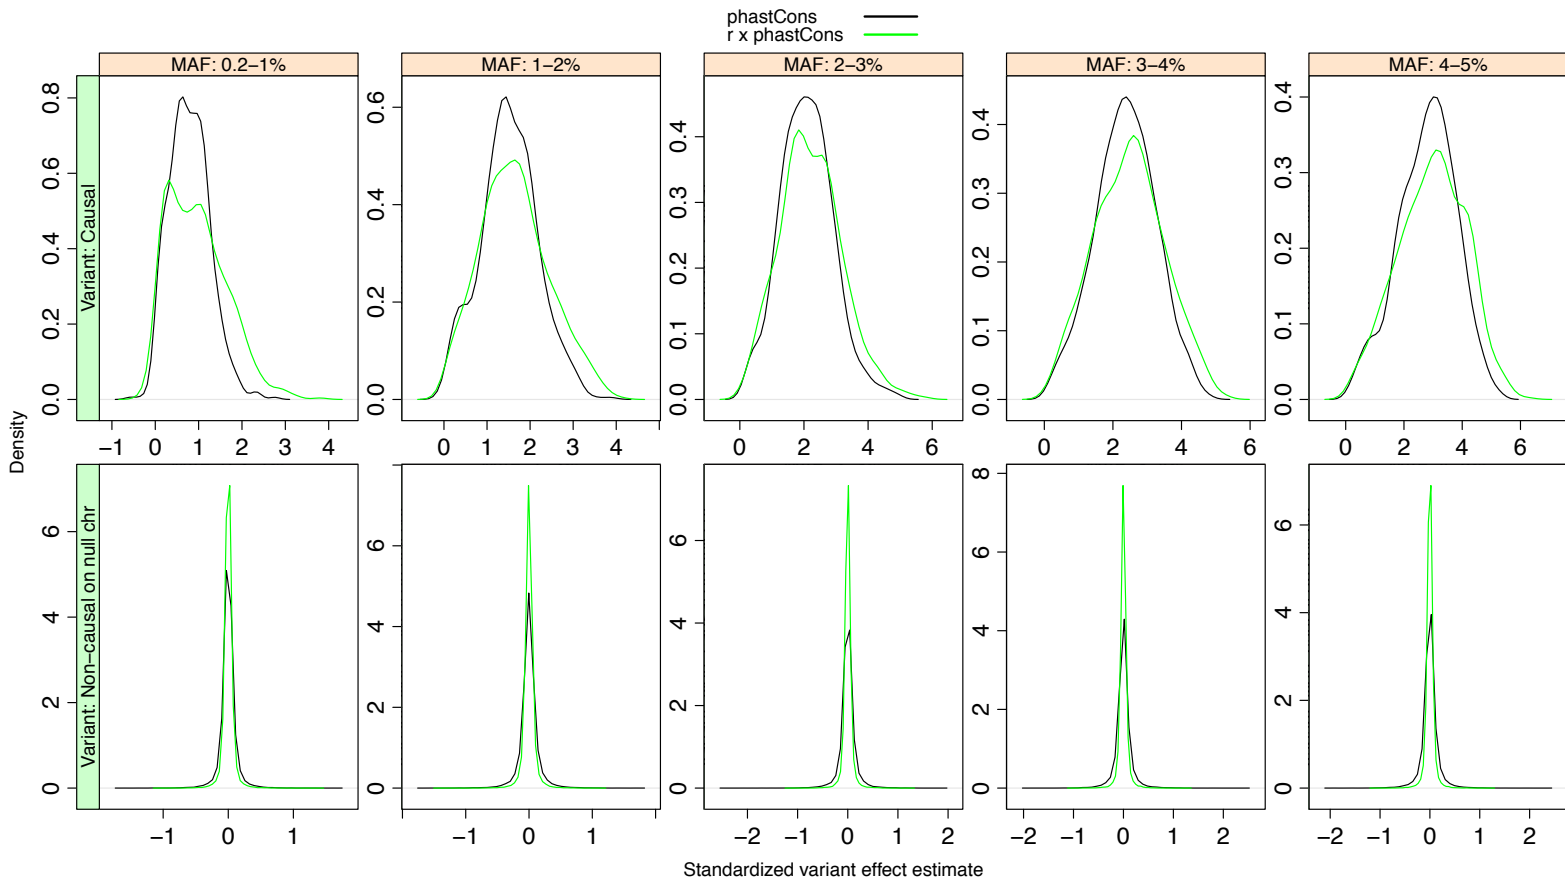

Figure S 5: Distributions of standardized variant effect estimates from Bayesian liability model with  $\text{phastCons}$  weight and with  $r \times \text{phastCons}$  weight. In each scenario (plot), effect estimates of Bayesian with  $\text{phastCons}$  weight (or  $r \times \text{phastCons}$ ) were collected from 200 replicates to form a distribution density.
