# Supplementary material for: Leveraging Prior Information to Detect Causal Variants via Multi-Variant Regression
Source: PubMed Central journal article supplement (PMC3675126; doi:10.1371/journal.pcbi.1003093), 2013-06-06
Supplement: pcbi.1003093.s006.pdf [file pcbi.1003093.s006.pdf]

Figure S 6: Same as Figure 2 except that weight is shown on the  $\log_{10}$  scale.
